# Supplementary material for: Efficient urea synthesis via one-step N–C–N coupling: strong metal–support interaction-driven planar Cu clusters on two-dimensional Mo2C MXene
Source: Royal Society of Chemistry journal article supplement (doi:10.1039/d4ta02393e), 2024-01-01
Supplement: d4ta02393e1.pdf [file d4ta02393e1.pdf]

## Supporting Information

**Efficient Urea Synthesis via One-Step N–C–N Coupling: Strong Metal-Support**

**Interaction-Driven Planar Cu Clusters on two-dimensional Mo<sub>2</sub>C MXene**

*Yue Zhang,<sup>1</sup> Linguo Lu,<sup>2</sup> Tiantian Zhao,<sup>1</sup> Jingxiang Zhao,<sup>1,\*</sup> Qinghai Cai,<sup>1</sup> Zhongfang Chen<sup>2,\*</sup>*

*<sup>1</sup> College of Chemistry and Chemical Engineering, and Key Laboratory of Photonic and Electronic Bandgap Materials, Ministry of Education, Harbin Normal University, Harbin, 150025, China*

*<sup>2</sup> Department of Chemistry, University of Puerto Rico, Rio Piedras Campus, San Juan, Puerto Rico 00931, USA*

\* To whom correspondence should be addressed. Email: [zhaojingxiang@hrbnu.edu.cn](mailto:zhaojingxiang@hrbnu.edu.cn)

(J. Z.); [zhongfang.chen1@upr.edu](mailto:zhongfang.chen1@upr.edu) (Z.C.)

## COMPUTATIONAL DETAILS

The dissolution potential ( $U_{\text{diss}} = U^{\circ} \text{diss}(\text{bulk}) - E_f/ne$ ) is a good parameter to evaluate the electrochemical stability of the catalyst, where  $U^{\circ} \text{diss}(\text{bulk})$ ,  $E_f$  and  $n$  are respectively the standard dissolution potential ( $U^{\circ} \text{diss}(\text{bulk})$ ) of the bulk metal, the generation energy of the catalyst, and the number of electrons involved in the dissolution. To be specific, the standard dissolution potential for bulk metals uses the experimental standard dissolution potential of the metal atoms ( $U^{\circ} \text{diss}(\text{bulk})$ ). For the generation energy, it can be calculated according to  $E_f = (E_{\text{Cu}_4/\text{Mo}_2\text{C}} - E_{\text{Mo}_2\text{C}} - 4 \times E_{\text{Cu}})/4$ , where  $E_{\text{Cu}_4/\text{Mo}_2\text{C}}$ ,  $E_{\text{Mo}_2\text{C}}$ , and  $E_{\text{Cu}}$  are respectively the total energy per atom in the cluster system,  $\text{Mo}_2\text{C}$ , and Cu metal. Taking  $\text{Cu}_4/\text{Mo}_2\text{C}$  as an example, with  $U^{\circ} \text{diss}(\text{bulk})$  of 0.34 V, the calculated  $E_f$  is -0.50 eV. Therefore, its  $U_{\text{diss}}$  can be derived

$$\text{by: } U_{\text{diss}} = [0.34 \text{ V} - (-0.50 \text{ eV})/2e] = 0.59 \text{ V}.$$

**Table S1.** The computed Gibbs free energy changes ( $\Delta G$ , eV) of each elementary step during urea synthesis on the Cu<sub>4</sub>/Mo<sub>2</sub>C. The preferable elementary step was marked in red.

| Elementary step                                                                                                      | $\Delta G$   |
|----------------------------------------------------------------------------------------------------------------------|--------------|
| * + NO $\rightarrow$ NO*                                                                                             | -1.06        |
| <b>NO* + NO <math>\rightarrow</math> NO* + NO*</b>                                                                   | <b>-0.69</b> |
| NO* + CO $\rightarrow$ NO* + CO*                                                                                     | 0.04         |
| NO* + H <sup>+</sup> + e <sup>-</sup> $\rightarrow$ NOH*                                                             | 0.21         |
| NO* + H <sup>+</sup> + e <sup>-</sup> $\rightarrow$ HNO*                                                             | -0.11        |
| <b>NO* + NO* + CO <math>\rightarrow</math> NO* + NO* + CO*</b>                                                       | <b>-0.29</b> |
| NO* + NO* + H <sup>+</sup> + e <sup>-</sup> $\rightarrow$ NOH* + NO*                                                 | 0.30         |
| NO* + NO* + H <sup>+</sup> + e <sup>-</sup> $\rightarrow$ HNO* + NO*                                                 | 0.19         |
| NO* + NO* $\rightarrow$ *NO-NO*                                                                                      | 0.21         |
| <b>NO* + NO* + CO* <math>\rightarrow</math> NO*-NO* + CO*</b>                                                        | <b>-0.01</b> |
| NO* + NO* + CO* $\rightarrow$ NO*-CO* + NO*                                                                          | 0.53         |
| <b>NO*-NO* + CO* + H<sup>+</sup> + e<sup>-</sup> <math>\rightarrow</math> NOH*-NO* + CO*</b>                         | <b>-0.71</b> |
| NO*-NO* + CO* + H <sup>+</sup> + e <sup>-</sup> $\rightarrow$ HNO*-NO* + CO*                                         | -0.17        |
| NO*-NO* + CO* + H <sup>+</sup> + e <sup>-</sup> $\rightarrow$ NO*-NO* + COH*                                         | 2.52         |
| NO*-NO* + CO* + H <sup>+</sup> + e <sup>-</sup> $\rightarrow$ NO*-NO* + CHO*                                         | 0.95         |
| <b>NOH*-NO* + CO* + H<sup>+</sup> + e<sup>-</sup> <math>\rightarrow</math> N*-NO* + CO*</b>                          | <b>-0.65</b> |
| NOH*-NO* + CO* + H <sup>+</sup> + e <sup>-</sup> $\rightarrow$ HNOH*-NO* + CO*                                       | 1.14         |
| NOH*-NO* + CO* + H <sup>+</sup> + e <sup>-</sup> $\rightarrow$ NOH*-NOH* + CO*                                       | 0.63         |
| NOH*-NO* + CO* + H <sup>+</sup> + e <sup>-</sup> $\rightarrow$ NOH*-NHO* + CO*                                       | 0.69         |
| NOH*-NO* + CO* + H <sup>+</sup> + e <sup>-</sup> $\rightarrow$ NOH*-NO* + COH*                                       | 2.85         |
| NOH*-NO* + CO* + H <sup>+</sup> + e <sup>-</sup> $\rightarrow$ NOH*-NO* + CHO*                                       | 1.01         |
| <b>N*-NO* + CO* + H<sup>+</sup> + e<sup>-</sup> <math>\rightarrow</math> NH*-NO* + CO*</b>                           | <b>-1.06</b> |
| N*-NO* + CO* + H <sup>+</sup> + e <sup>-</sup> $\rightarrow$ N*-NOH* + CO*                                           | -0.58        |
| N*-NO* + CO* + H <sup>+</sup> + e <sup>-</sup> $\rightarrow$ N*-NHO* + CO*                                           | -0.69        |
| N*-NO* + CO* + H <sup>+</sup> + e <sup>-</sup> $\rightarrow$ N*-NO* + COH*                                           | 2.58         |
| N*-NO* + CO* + H <sup>+</sup> + e <sup>-</sup> $\rightarrow$ N*-NO* + CHO*                                           | 1.13         |
| <b>NH*-NO* + CO* + H<sup>+</sup> + e<sup>-</sup> <math>\rightarrow</math> NH<sub>2</sub>*-NO* + CO*</b>              | <b>0.36</b>  |
| NH*-NO* + CO* + H <sup>+</sup> + e <sup>-</sup> $\rightarrow$ NH*-NOH* + CO*                                         | 0.58         |
| NH*-NO* + CO* + H <sup>+</sup> + e <sup>-</sup> $\rightarrow$ NH*-NHO* + CO*                                         | 0.67         |
| NH*-NO* + CO* + H <sup>+</sup> + e <sup>-</sup> $\rightarrow$ NH*-NO* + COH*                                         | 2.52         |
| NH*-NO* + CO* + H <sup>+</sup> + e <sup>-</sup> $\rightarrow$ NH*-NO* + CHO*                                         | 0.98         |
| <b>NH<sub>2</sub>*-NO* + CO* + H<sup>+</sup> + e<sup>-</sup> <math>\rightarrow</math> NH<sub>2</sub>*-NOH* + CO*</b> | <b>-0.05</b> |
| NH <sub>2</sub> *-NO* + CO* + H <sup>+</sup> + e <sup>-</sup> $\rightarrow$ NH <sub>2</sub> *-NHO* + CO*             | 0.26         |
| NH <sub>2</sub> *-NO* + CO* + H <sup>+</sup> + e <sup>-</sup> $\rightarrow$ NH <sub>2</sub> *-NO* + COH*             | 1.67         |
| NH <sub>2</sub> *-NO* + CO* + H <sup>+</sup> + e <sup>-</sup> $\rightarrow$ NH <sub>2</sub> *-NO* + CHO*             | 0.97         |

|                                                                                                                                        |       |
|----------------------------------------------------------------------------------------------------------------------------------------|-------|
| $\text{NH}_2^*-\text{NOH}^* + \text{CO}^* + \text{H}^+ + \text{e}^- \rightarrow \text{NH}_2^*-\text{N}^* + \text{CO}^*$                | -1.14 |
| $\text{NH}_2^*-\text{NOH}^* + \text{CO}^* + \text{H}^+ + \text{e}^- \rightarrow \text{NH}_2^*-\text{NHOH}^* + \text{CO}^*$             | 0.14  |
| $\text{NH}_2^*-\text{NOH}^* + \text{CO}^* + \text{H}^+ + \text{e}^- \rightarrow \text{NH}_2^*-\text{NOH}^* + \text{COH}^*$             | 2.39  |
| $\text{NH}_2^*-\text{NOH}^* + \text{CO}^* + \text{H}^+ + \text{e}^- \rightarrow \text{NH}_2^*-\text{NOH}^* + \text{CHO}^*$             | 0.93  |
| $\text{NH}_2^*-\text{N}^* + \text{CO}^* + \text{H}^+ + \text{e}^- \rightarrow \text{NH}_2^*-\text{NH}^* + \text{CO}^*$                 | -0.85 |
| $\text{NH}_2^*-\text{N}^* + \text{CO}^* + \text{H}^+ + \text{e}^- \rightarrow \text{NH}_2^*-\text{N}^* + \text{COH}^*$                 | 2.57  |
| $\text{NH}_2^*-\text{N}^* + \text{CO}^* + \text{H}^+ + \text{e}^- \rightarrow \text{NH}_2^*-\text{N}^* + \text{CHO}^*$                 | 0.95  |
| $\text{NH}_2^*-\text{NH}^* + \text{CO}^* + \text{H}^+ + \text{e}^- \rightarrow \text{NH}_2^*-\text{NH}_2^* + \text{CO}^*$              | -0.11 |
| $\text{NH}_2^*-\text{NH}^* + \text{CO}^* + \text{H}^+ + \text{e}^- \rightarrow \text{NH}_2^*-\text{NH}^* + \text{COH}^*$               | 2.38  |
| $\text{NH}_2^*-\text{NH}^* + \text{CO}^* + \text{H}^+ + \text{e}^- \rightarrow \text{NH}_2^*-\text{NH}^* + \text{CHO}^*$               | 3.79  |
| $\text{NH}_2^*-\text{NH}_2^* + \text{CO}^* + \text{H}^+ + \text{e}^- \rightarrow \text{NH}_2^*-\text{CO}-\text{NH}_2^*$                | -1.07 |
| $\text{NH}_2^*-\text{NH}_2^* + \text{CO}^* + \text{H}^+ + \text{e}^- \rightarrow \text{NH}_3(\text{g}) + \text{NH}_2^* + \text{COH}^*$ | -0.61 |
| $\text{NH}_2^*-\text{NH}_2^* + \text{CO}^* + \text{H}^+ + \text{e}^- \rightarrow \text{NH}_2^*-\text{NH}_2^* + \text{COH}^*$           | 1.60  |
| $\text{NH}_2^*-\text{NH}_2^* + \text{CO}^* + \text{H}^+ + \text{e}^- \rightarrow \text{NH}_2^*-\text{NH}_2^* + \text{CHO}^*$           | 0.97  |

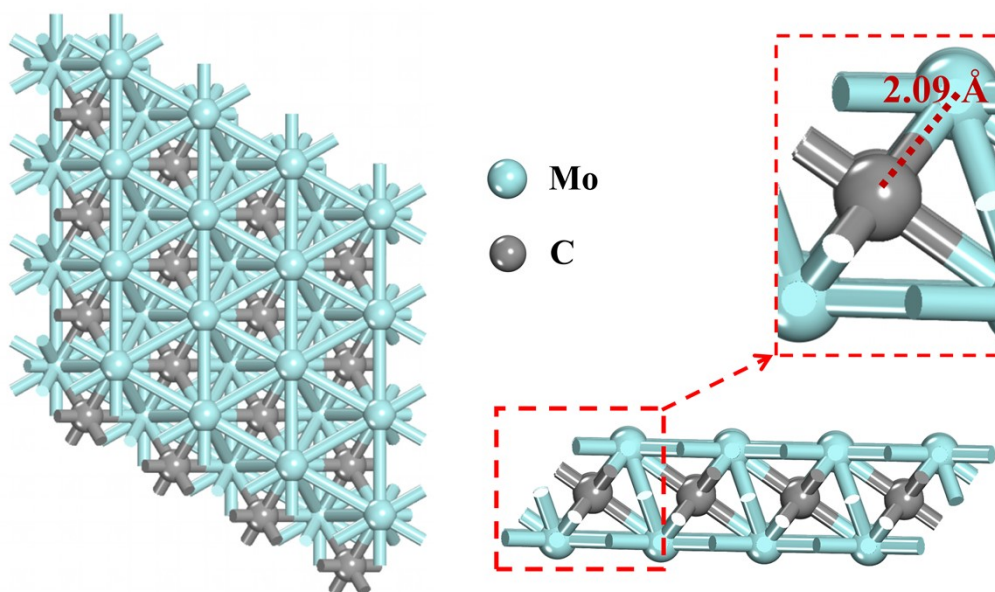

(a)

|                                                                                                              |                                                                                     |                                                                                                               |                                                                                       |
|--------------------------------------------------------------------------------------------------------------|-------------------------------------------------------------------------------------|---------------------------------------------------------------------------------------------------------------|---------------------------------------------------------------------------------------|
| <b>Cu<sub>4</sub></b><br>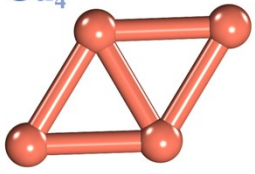  |   | <b>Cu<sub>5</sub></b><br>  |   |
| $\Delta E = 0.00 \text{ eV}$                                                                                 | $\Delta E = 0.68 \text{ eV}$                                                        | $\Delta E = 0.00 \text{ eV}$                                                                                  | $\Delta E = 0.42 \text{ eV}$                                                          |
| <b>Cu<sub>6</sub></b><br> |  | <b>Cu<sub>7</sub></b><br> |  |
| $\Delta E = 0.00 \text{ eV}$                                                                                 | $\Delta E = 0.10 \text{ eV}$                                                        | $\Delta E = 0.00 \text{ eV}$                                                                                  | $\Delta E = -0.24 \text{ eV}$                                                         |

(b)

**Fig. S1.** (a) Top and side views of the optimized Mo<sub>2</sub>C structure. (b) The planar and three-dimensional structures of the isolated Cu<sub>n</sub> clusters, as well as their respective relative energies ( $\Delta E$ ).

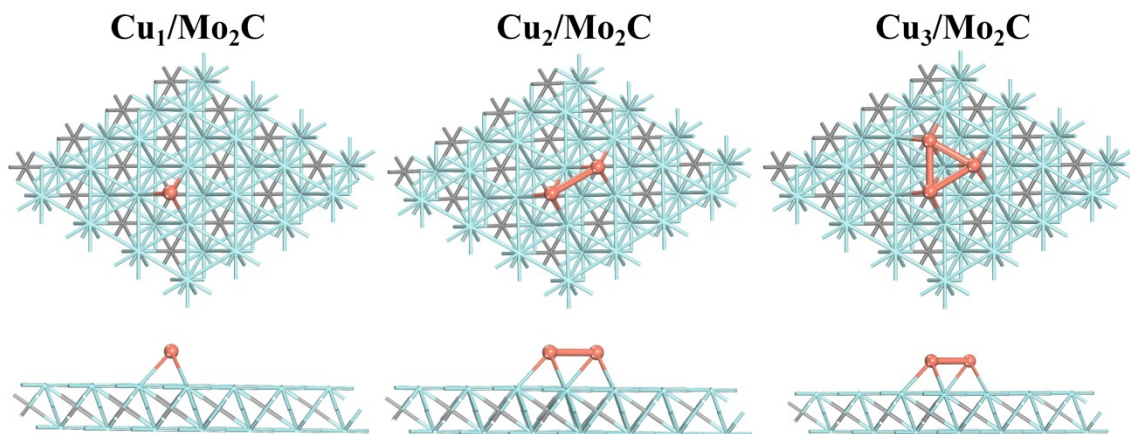

(a)

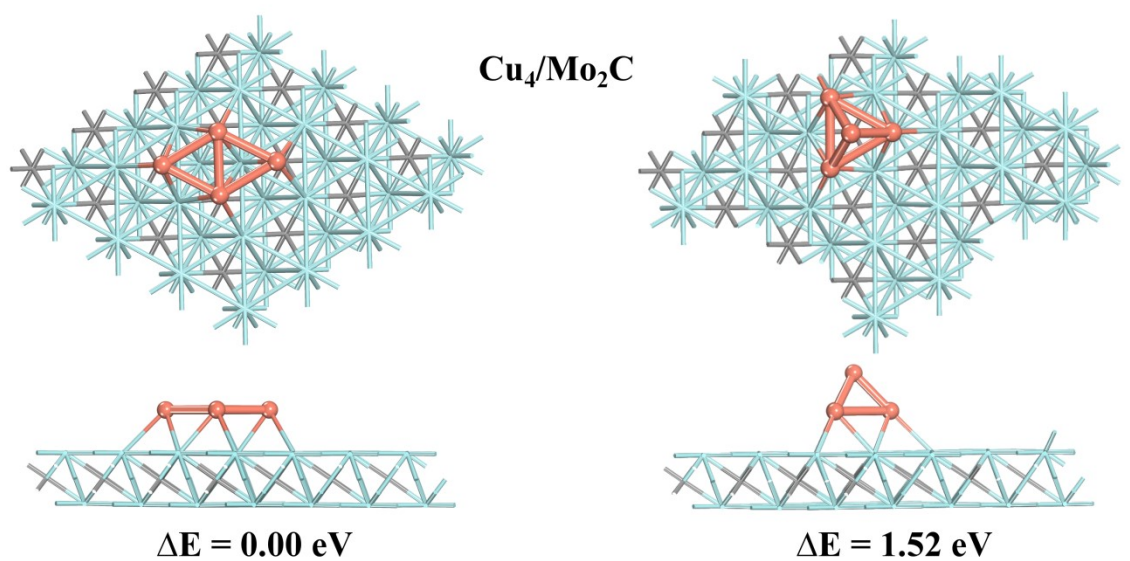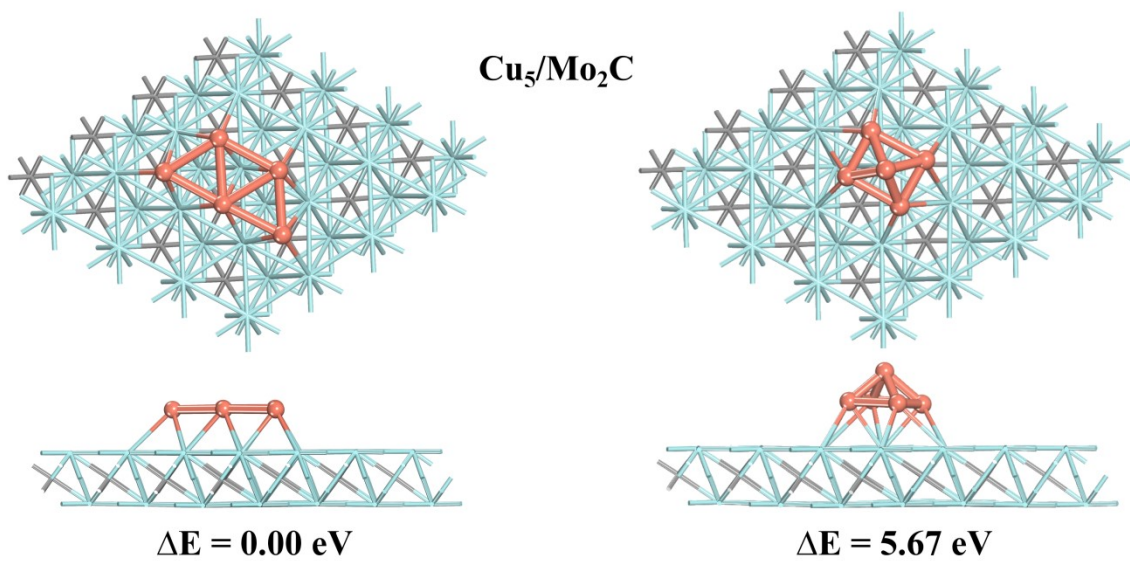

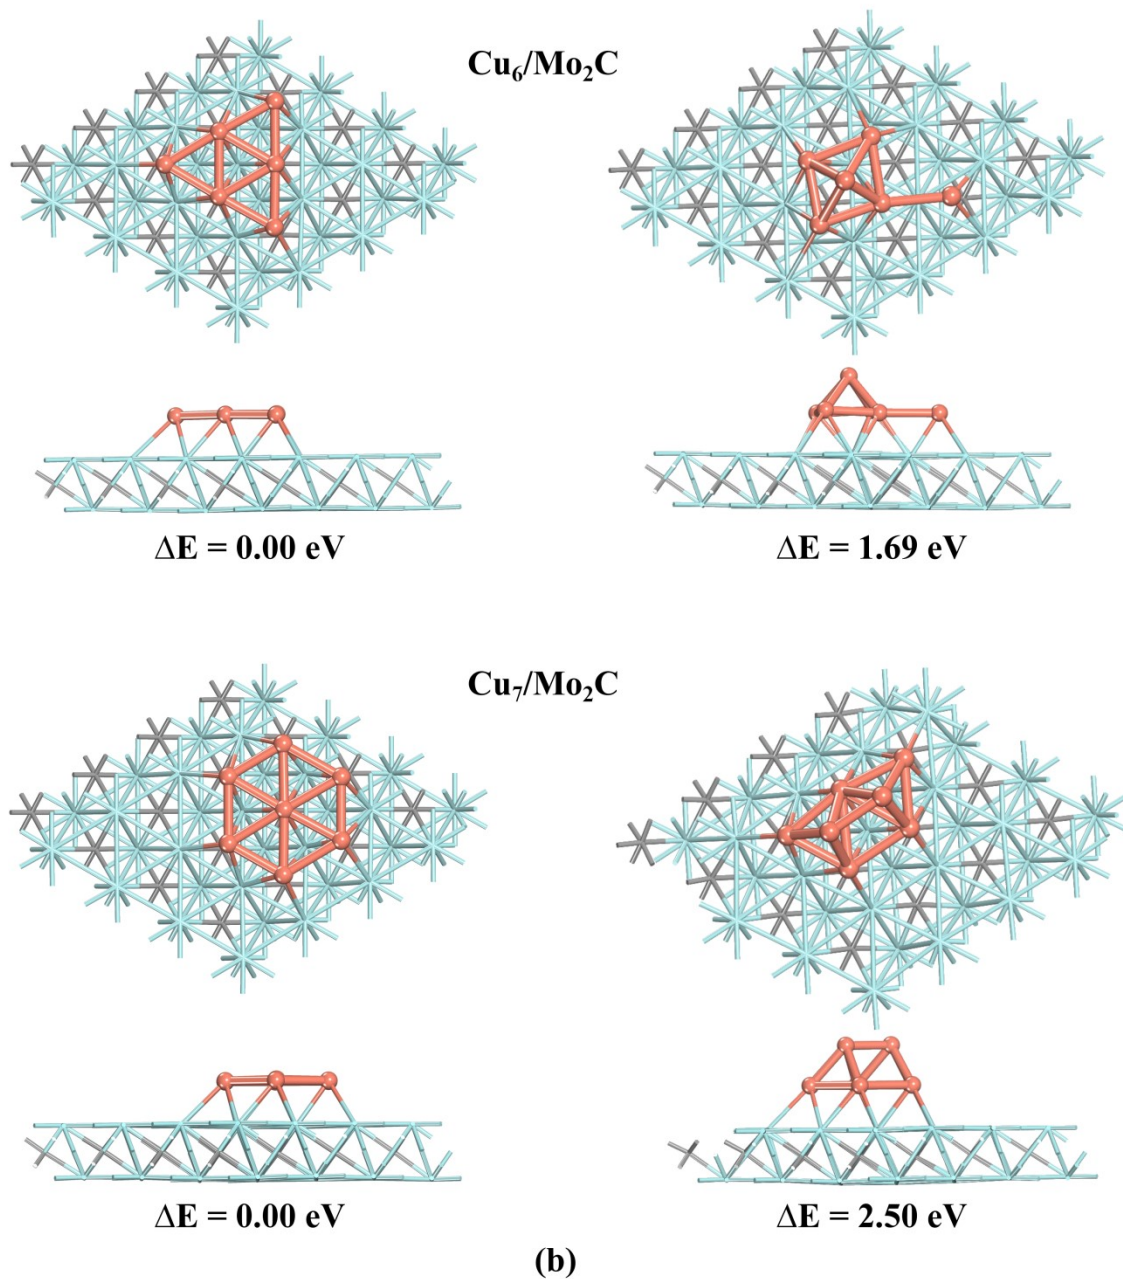

**Fig. S2.** The optimized configurations for (a) Cu<sub>1</sub>, Cu<sub>2</sub>, and Cu<sub>3</sub> and (b) Cu<sub>4</sub>, Cu<sub>5</sub>, Cu<sub>6</sub>, and Cu<sub>7</sub> clusters with three-dimensional and planar structures anchored on the Mo<sub>2</sub>C substrate and their relative energy difference ( $\Delta E$ ).

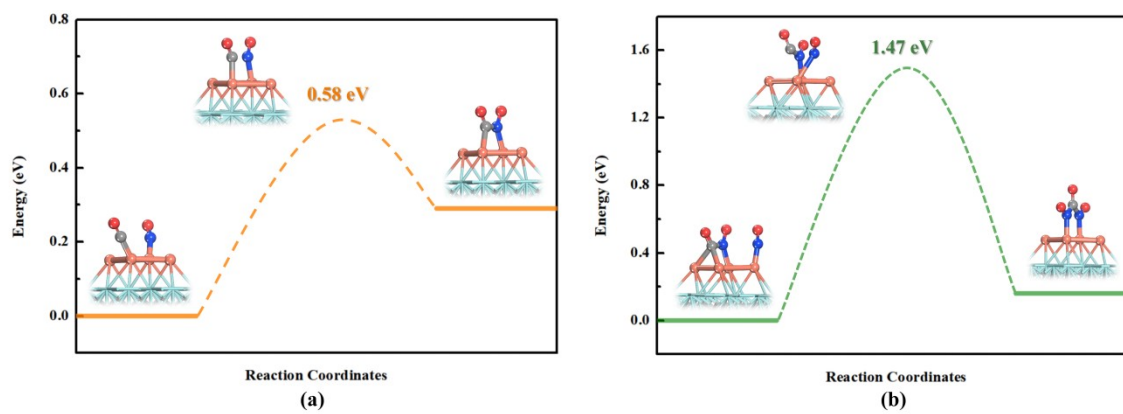

**Fig. S3.** The kinetic processes and the corresponding barrier for (a) the first C–N to  $\text{*NOCO*}$  and (b) the second C–N to form  $\text{NOCONO*}$  on  $\text{Cu}_4/\text{Mo}_2\text{C}$ .



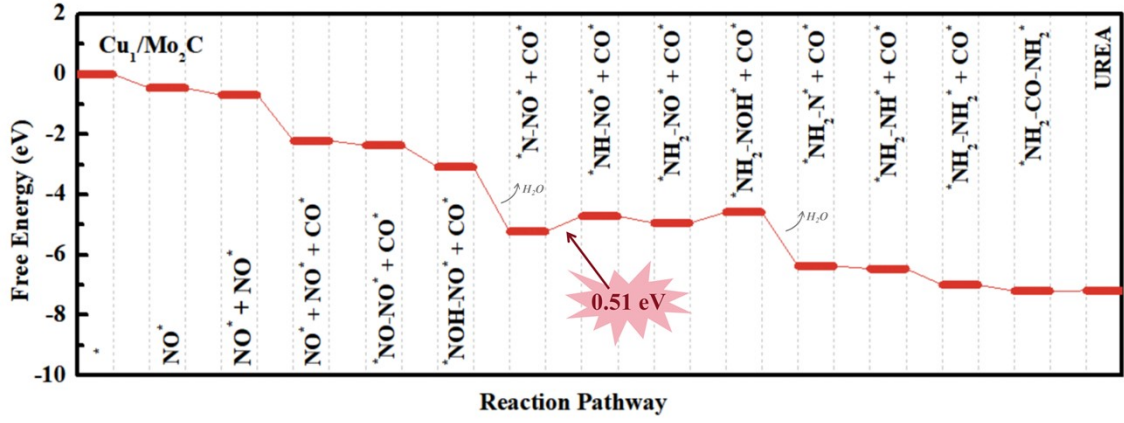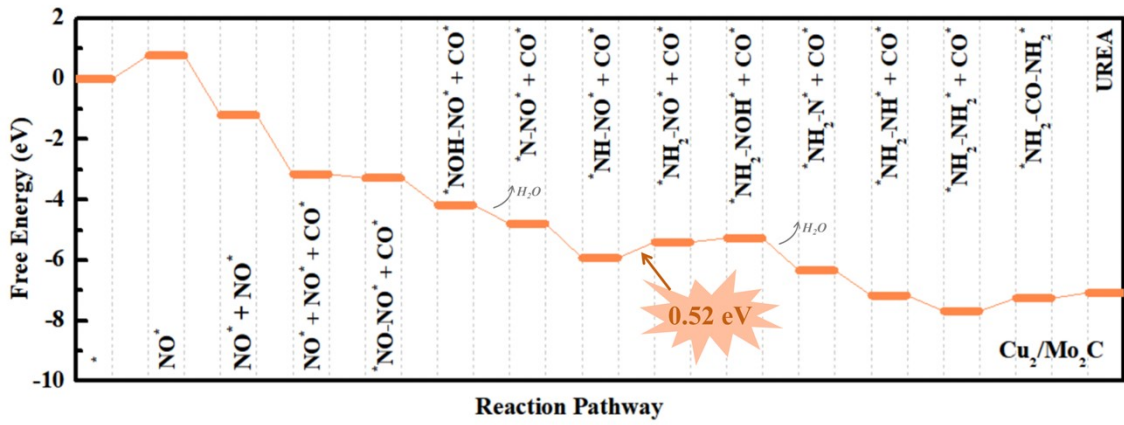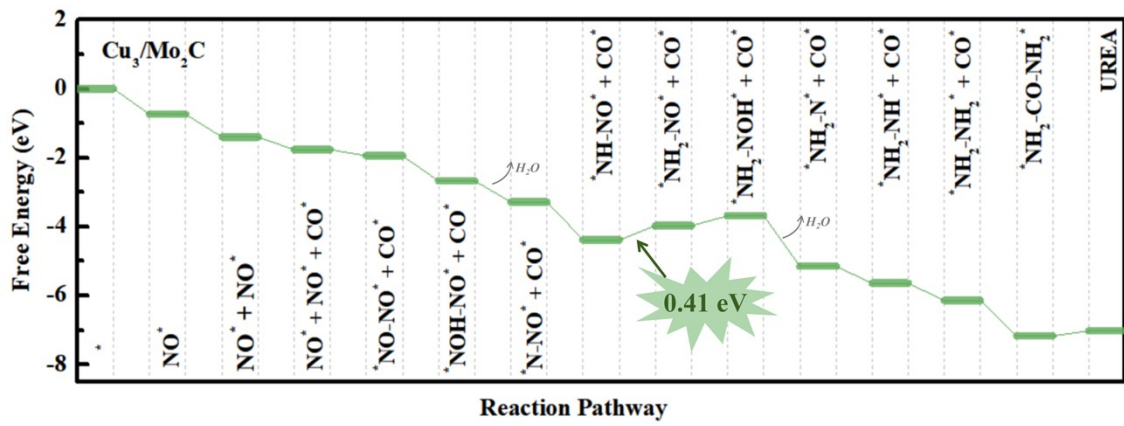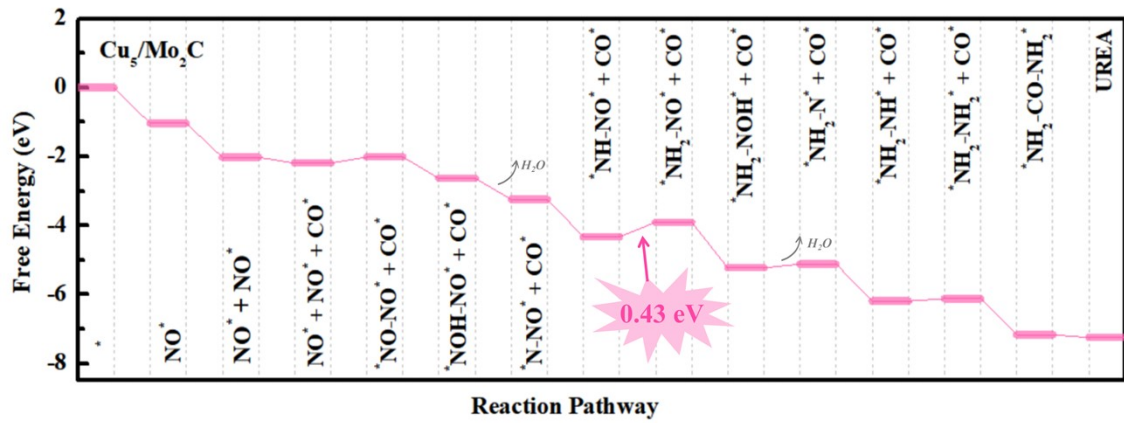

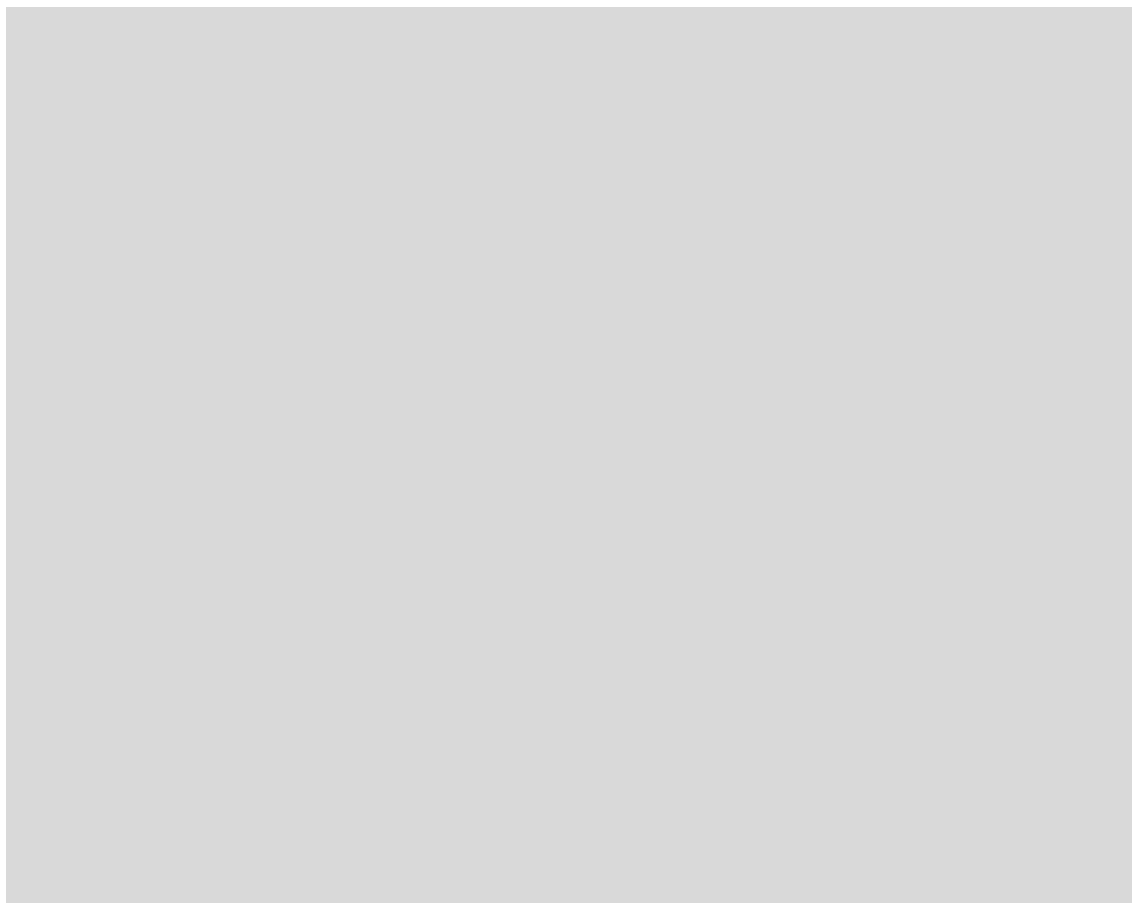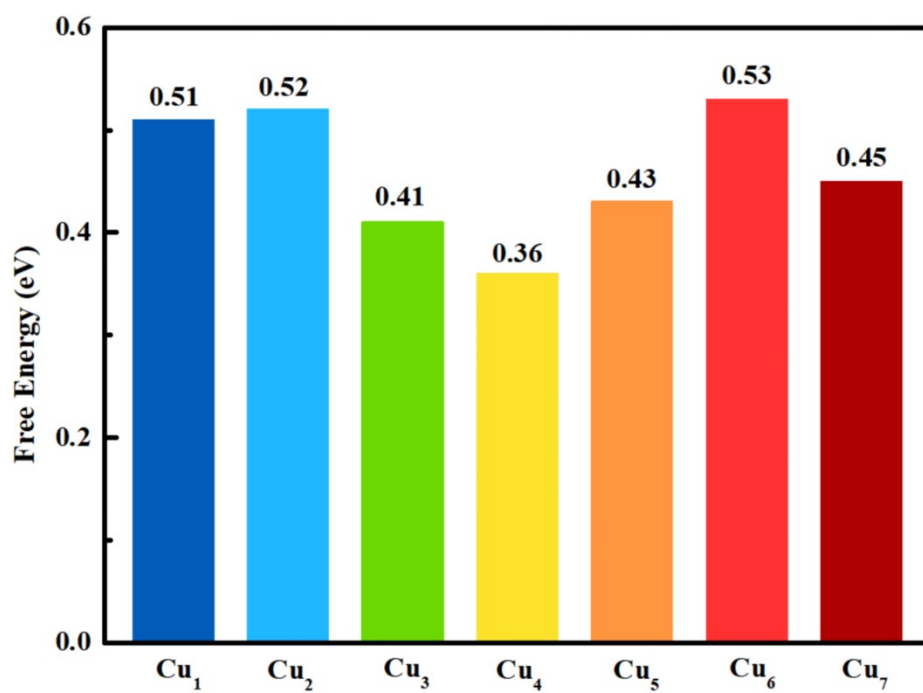

(b)

**Fig. S4.** (a) The Gibbs free energy profiles and (b) the maximum Gibbs free energy changes in the PDS for urea electrosynthesis on different Cu<sub>n</sub>/Mo<sub>2</sub>C catalysts.

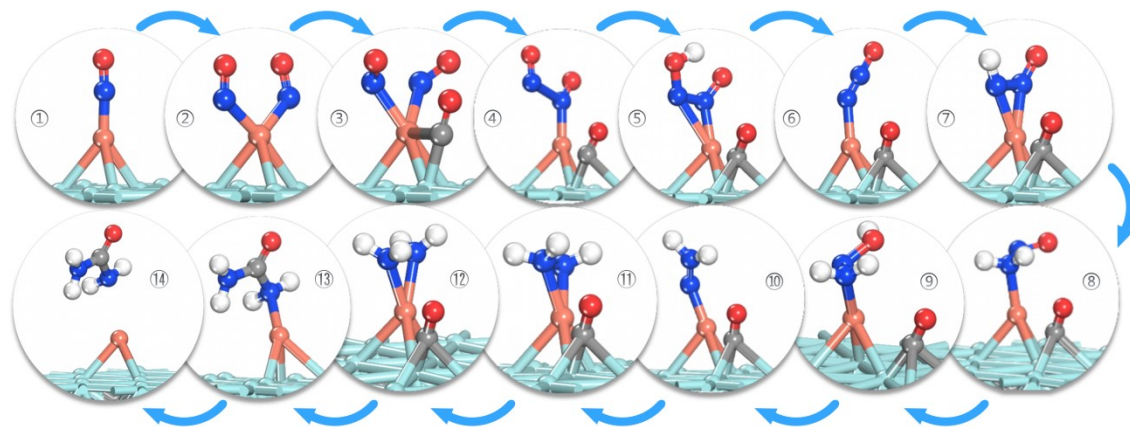

**Fig. S5.** All intermediates involved in the synthesis of urea on Cu<sub>1</sub>/Mo<sub>2</sub>C.

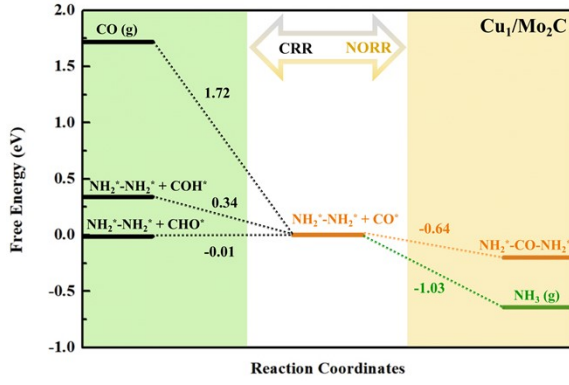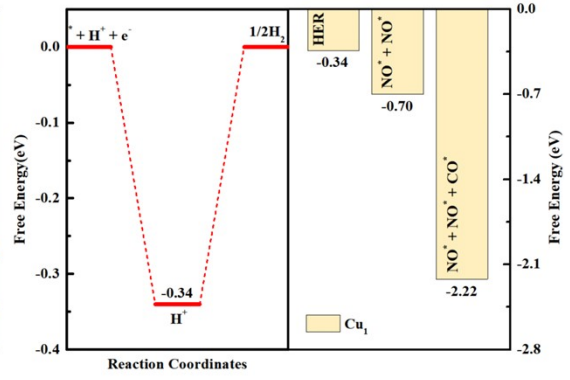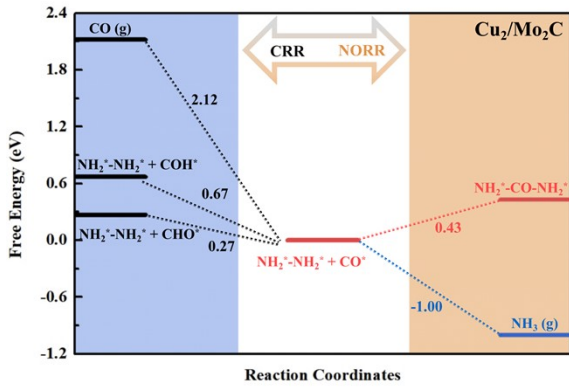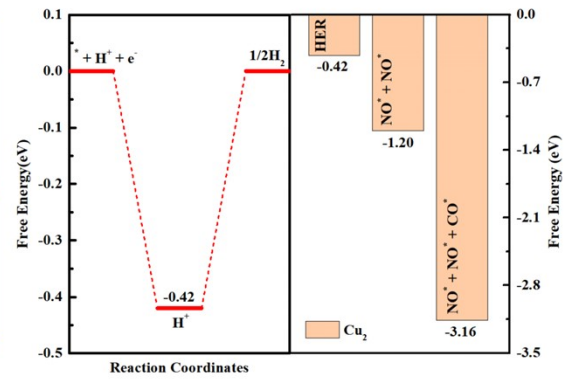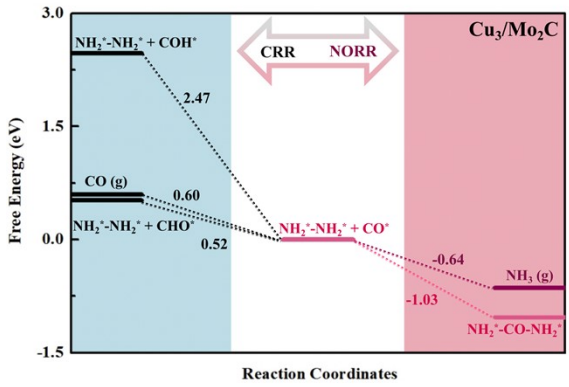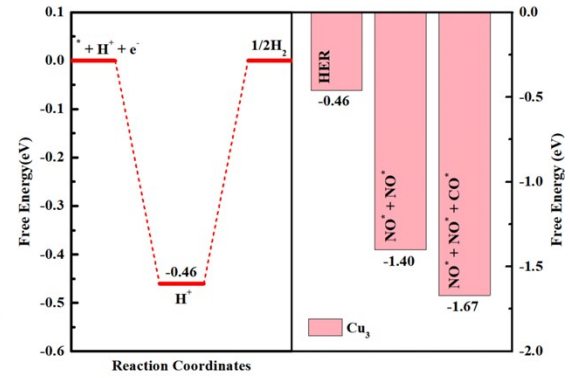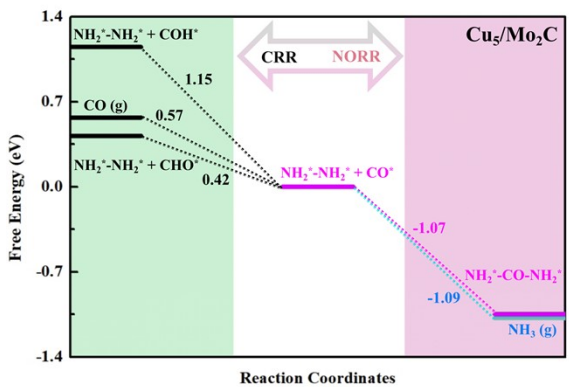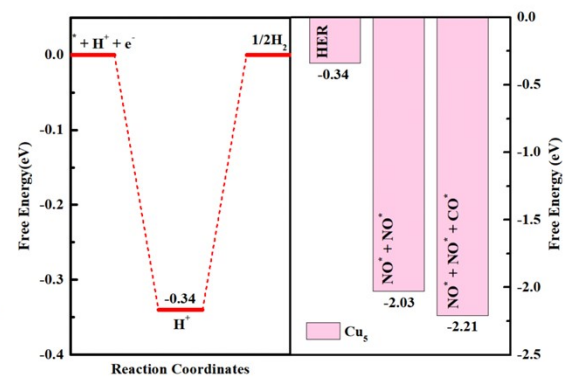

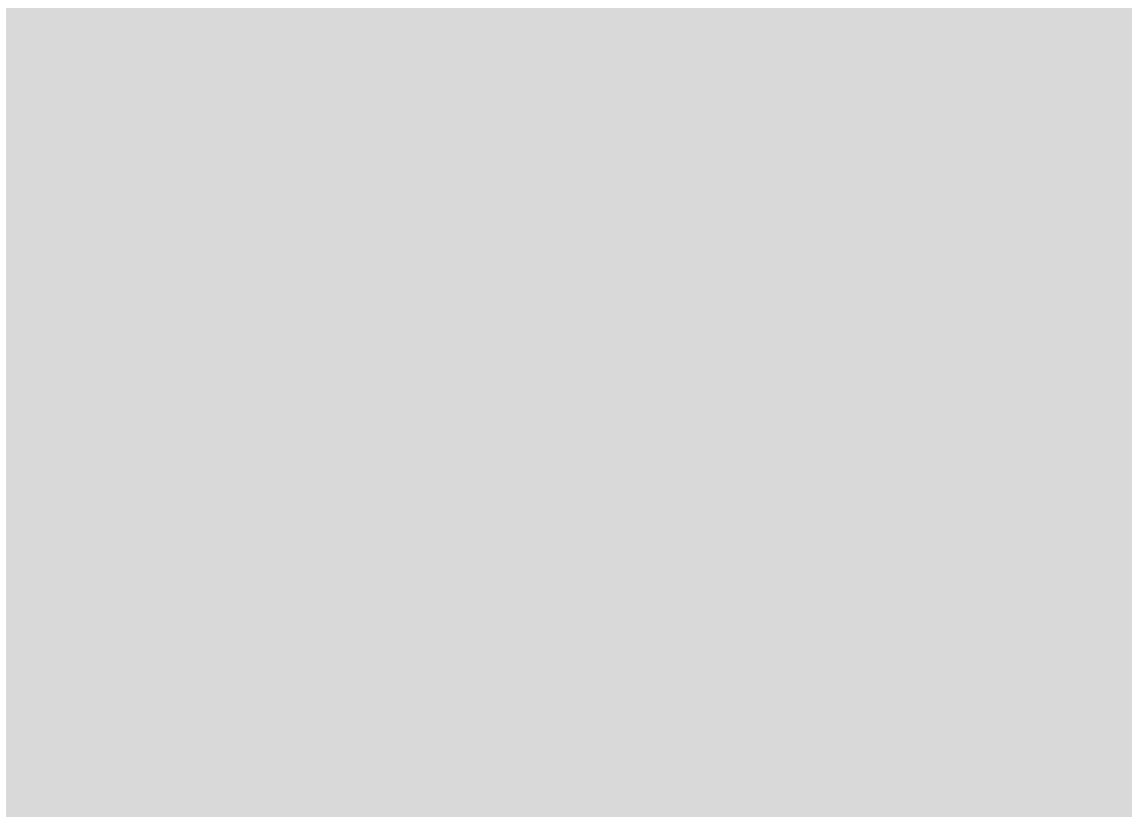

**Fig. S6.** Reaction energy landscape on the left for the subsequent reactions of co-adsorbed  $\text{NH}_2^*-\text{NH}_2^*$  and  $\text{CO}^*$  on  $\text{Cu}_n/\text{Mo}_2\text{C}$  ( $n = 1, 2, 3, 5, 6, 7$ ). On the right is the corresponding HER plot and a comparison of the hydrogen adsorption free energy ( $\Delta G_{\text{H}^*}$ ) with the adsorption free energy of  $(\text{NO}^* + \text{NO}^*)$  and  $(\text{NO}^* + \text{NO}^* + \text{CO}^*)$ .

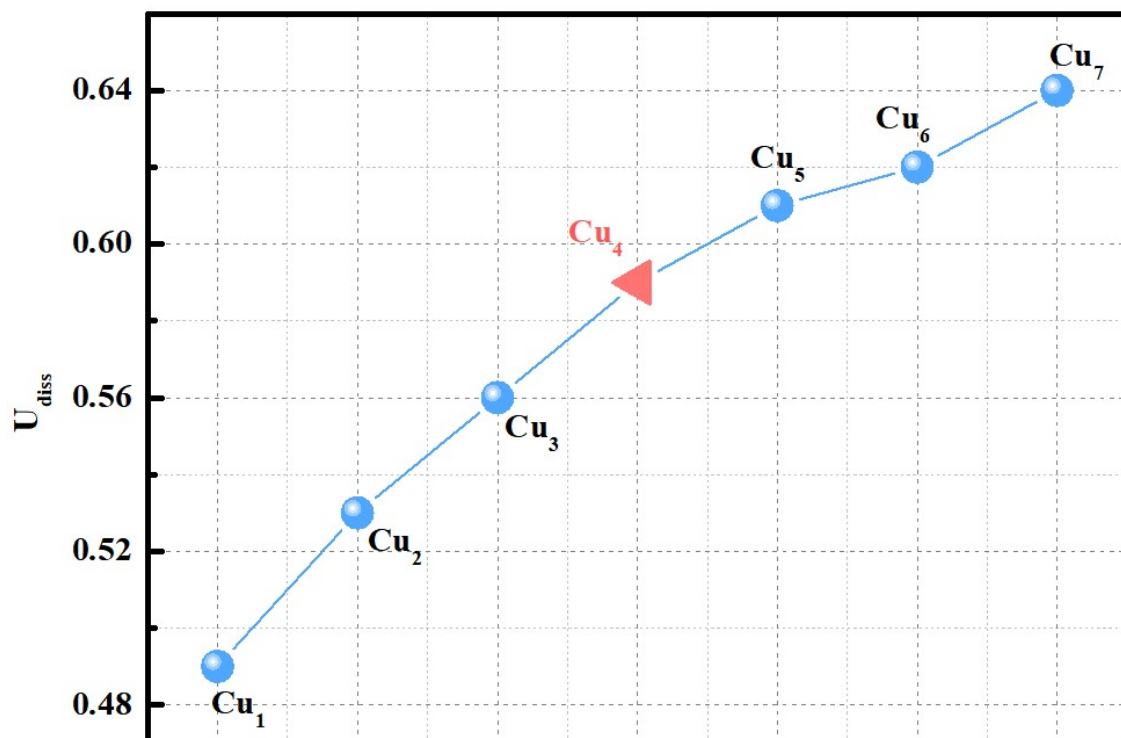

**Fig. S7.** The dissolution potential value of  $\text{Cu}_n/\text{Mo}_2\text{C}$  ( $n = 1 \sim 7$ ).

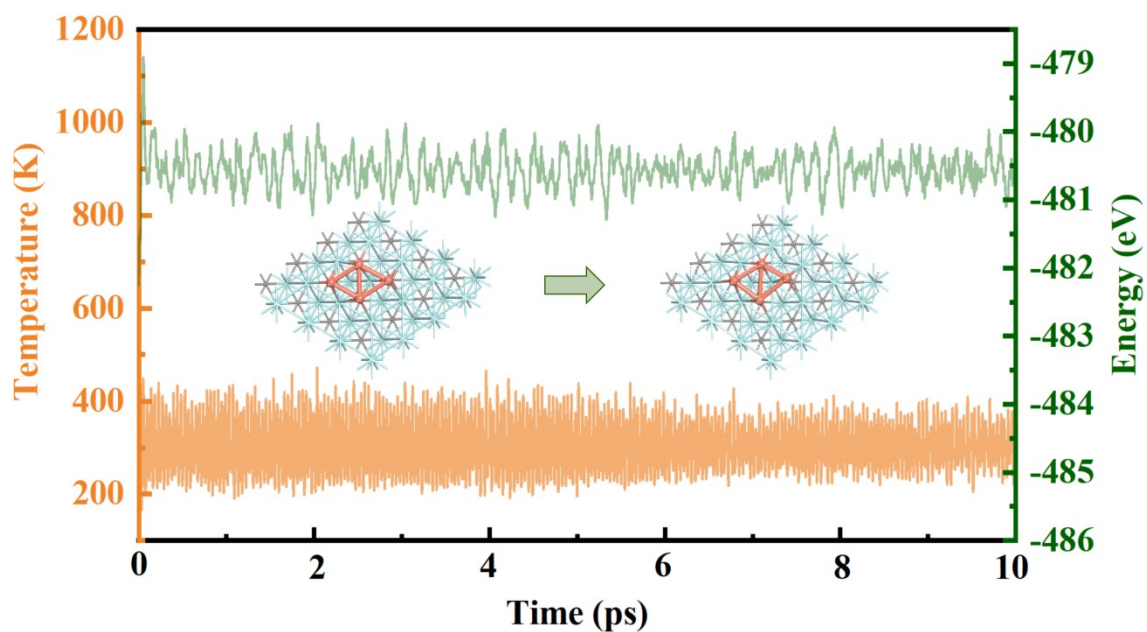

**Fig. S8.** Variations of temperature and energy as a function of the time for AIMD simulations of  $\text{Cu}_4/\text{Mo}_2\text{C}$ ; insert are top and side views of the snapshot of atomic configuration. The simulation is run under 300 K for 10 ps with a time step of 2 fs.
